# Supplementary material
Source: PubMed Central journal article supplement (PMC3697599)
Supplement: IAI.00214-13_zii999090197so1.pdf [file IAI.00214-13_zii999090197so1.pdf]

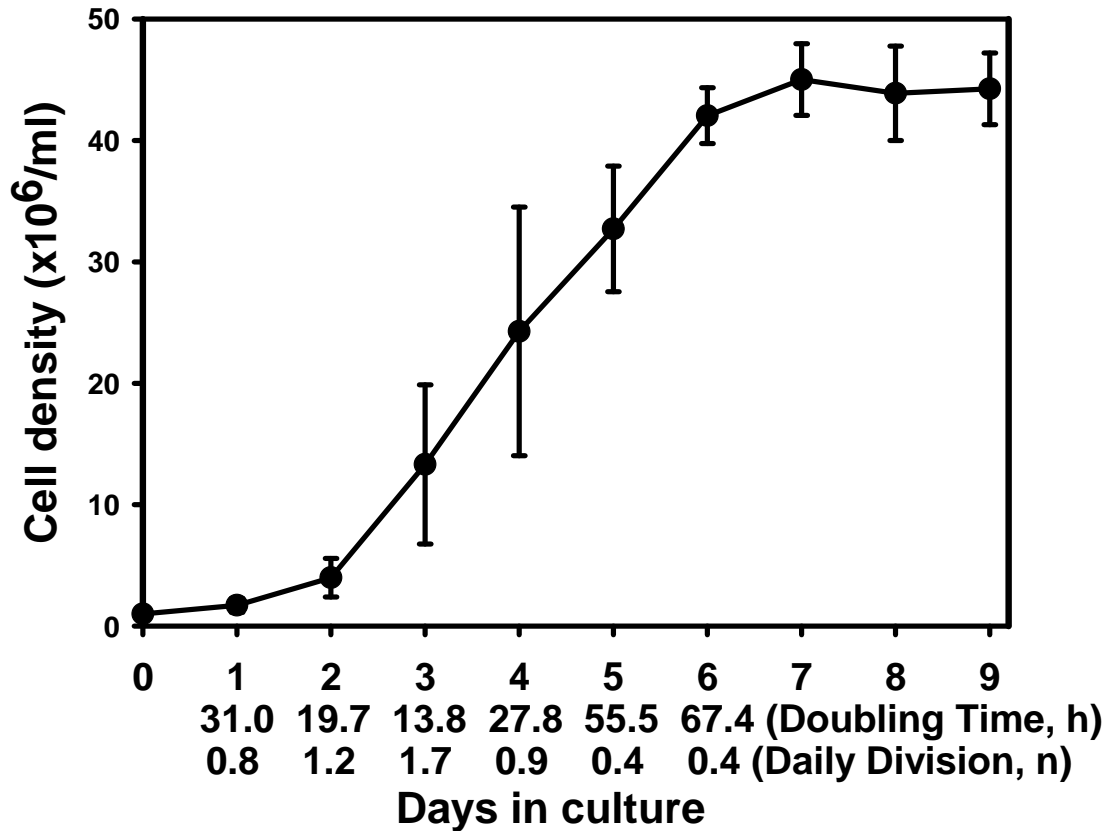

**Supplemental Figure 1:** Growth curve of *Lic* promastigotes. The average and standard deviation of nine independent experiments are presented. Each culture was started with stationary phase promastigotes diluted at an initial cell density of  $1 \times 10^6$  cells/ml (day 0) and incubated in cell culture medium for 9 days. Cells were microscopically enumerated daily. The number of cell divisions (n) and the doubling time (h) for each day of cell culture were calculated and are listed below the graph.

| Hit | SI  | RSI | Prob  | Name                                                                               | Library Name |
|-----|-----|-----|-------|------------------------------------------------------------------------------------|--------------|
| 1   | 891 | 910 | 72.52 | Cholesterol trimethylsilyl ether                                                   | mainlib      |
| 2   | 888 | 898 | 72.52 | Cholesterol trimethylsilyl ether                                                   | replib       |
| 3   | 883 | 907 | 72.52 | Cholesterol trimethylsilyl ether                                                   | replib       |
| 4   | 861 | 897 | 72.52 | Cholesterol trimethylsilyl ether                                                   | replib       |
| 5   | 849 | 889 | 16.27 | 3 $\alpha$ ,5-Bis(trimethylsiloxy)-5 $\alpha$ -cholestane                          | mainlib      |
| 6   | 829 | 837 | 7.41  | 3 $\alpha$ -(Trimethylsiloxy)cholest-4-ene                                         | mainlib      |
| 7   | 815 | 878 | 16.27 | 3 $\alpha$ ,5-Bis(trimethylsiloxy)-5 $\alpha$ -cholestane                          | replib       |
| 8   | 792 | 862 | 1.80  | 3 $\alpha$ -(Trimethylsiloxy)cholest-5-ene                                         | mainlib      |
| 9   | 785 | 819 | 72.52 | Cholesterol trimethylsilyl ether                                                   | replib       |
| 10  | 713 | 750 | 0.20  | Cholest-5-ene, 3-methoxy-, (3 $\alpha$ -)                                          | replib       |
| 11  | 704 | 796 | 0.14  | Cholesta-3,5-diene                                                                 | replib       |
| 12  | 704 | 744 | 0.20  | Cholest-5-ene, 3-methoxy-, (3 $\alpha$ -)                                          | mainlib      |
| 13  | 703 | 756 | 0.14  | Cholest-5-ene, 3-ethoxy-, (3 $\alpha$ -)                                           | mainlib      |
| 14  | 703 | 762 | 0.14  | Cholesterol 3 $\alpha$ -O-[2-chloroethyl]- ether                                   | mainlib      |
| 15  | 696 | 722 | 0.10  | Cholesterol                                                                        | replib       |
| 16  | 690 | 822 | 0.14  | Cholesta-3,5-diene                                                                 | replib       |
| 17  | 690 | 786 | 0.08  | Cholest-5-en-3-ol (3 $\alpha$ -), nonanoate                                        | mainlib      |
| 18  | 689 | 779 | 0.08  | Cholest-5-en-3-ol (3 $\alpha$ -), tetradecanoate                                   | mainlib      |
| 19  | 688 | 714 | 0.07  | Cholesterol margarate                                                              | mainlib      |
| 20  | 687 | 713 | 0.07  | 5-Cholesten-3beta-yl isobutyl carbonate                                            | mainlib      |
| 21  | 687 | 716 | 0.07  | Silane, [[[3 $\alpha$ ,5 $\alpha$ ,6 $\alpha$ ]-cholestane-3,6-diy]]bis(ox mainlib |              |
| 22  | 686 | 833 | 0.14  | Cholesta-3,5-diene                                                                 | replib       |
| 23  | 685 | 710 | 0.07  | Cholesteryl benzoate                                                               | mainlib      |
| 24  | 685 | 817 | 0.07  | Cholest-5-en-3-ol (3 $\alpha$ -), propanoate                                       | mainlib      |
| 25  | 685 | 773 | 0.07  | Cholest-5-ene, 3-(1-oxobuthoxy)-                                                   | mainlib      |

Cholesterol trimethylsilyl ether  
 Formula C<sub>30</sub>H<sub>54</sub>O<sub>Si</sub>, MW 458, CAS# 1856-05-9, Entry# 139760  
 Silane, [[[3 $\alpha$ ]-cholest-5-en-3-yl]]oxy]]trimethyl-

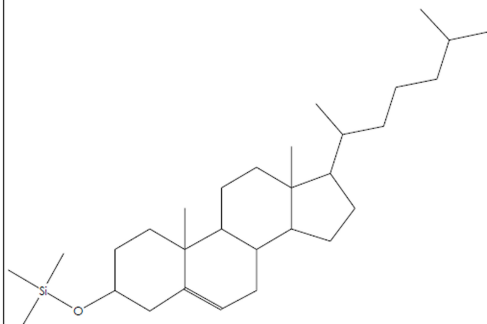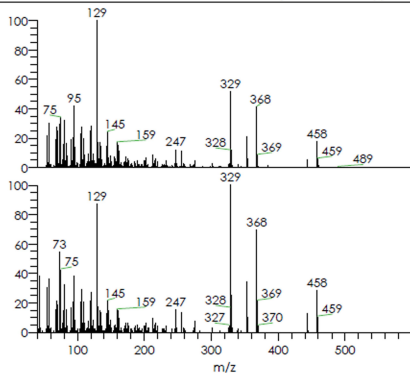

NL: 9.99E2  
 V5220812#841 RT: 17.33 AV:  
 1 SB: 8 19.48-19.60 T: [0,0] +  
 c EI det=349.00 Full ms [  
 50.00-600.00]

NL: 9.99E2  
 SI 891, RSI 910, mainlib,  
 Entry# 139760, CAS#  
 1856-05-9, Cholesterol  
 trimethylsilyl ether

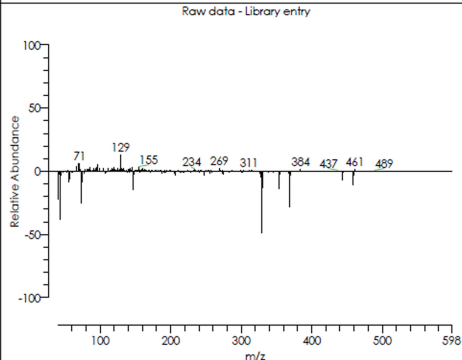

Raw data - Library entry

| Hit | SI  | RSI | Prob  | Name                                                         | Library Name |
|-----|-----|-----|-------|--------------------------------------------------------------|--------------|
| 1   | 759 | 837 | 88.42 | Silane, (ergosta-5,7,22-trien-3 $\alpha$ -yloxy)trimethyl-   | mainlib      |
| 2   | 669 | 760 | 7.56  | Ergosterol                                                   | replib       |
| 3   | 661 | 706 | 7.56  | Ergosterol                                                   | mainlib      |
| 4   | 659 | 732 | 7.56  | Ergosterol                                                   | replib       |
| 5   | 629 | 755 | 1.75  | Ergosta-5,8,22-trien-3-ol, (3 $\alpha$ ,22E)-                | mainlib      |
| 6   | 580 | 656 | 0.36  | Ergosta-9(11),20(22)-diene-3,6-diol, diacetate, (            | mainlib      |
| 7   | 577 | 726 | 0.31  | 3 $\alpha$ ,5-Cyclo-5 $\alpha$ -ergosta-6,8(14),22-triene    | mainlib      |
| 8   | 570 | 608 | 0.24  | 5,7,22-Ergostatriene, 3-(methoxymethoxy)-                    | mainlib      |
| 9   | 569 | 701 | 0.23  | 3,5-Cyclo-6,8(14),22-ergostatriene                           | mainlib      |
| 10  | 563 | 739 | 0.18  | Ergost-4,7,22-trien-3 $\alpha$ -ol                           | mainlib      |
| 11  | 550 | 579 | 0.11  | 5,8-(4-Phenyl-1,2,4-triazolidine-3,5-dione-1,2-diy)l         | mainlib      |
| 12  | 547 | 661 | 0.10  | Cholesta-9(11),20(22)-dien-23-one, 3,6-bis(acetyl            | mainlib      |
| 13  | 546 | 634 | 0.10  | Ergosta-5,7,22-trien-3-ol, acetate, (3 $\alpha$ ,22E)-       | replib       |
| 14  | 533 | 640 | 0.06  | Ergost-9(11)-ene-3,6,20-triol, 3,6-diacetate, (3 $\alpha$ ,5 | mainlib      |
| 15  | 527 | 616 | 0.05  | 19-Norbrassicaster-3-one, 7,8,9,10-tetrahydro                | replib       |
| 16  | 527 | 675 | 0.05  | 17-(1,5-Dimethyl-hex-2-enyl)-10,13-dimethyl-2,3,             | mainlib      |
| 17  | 524 | 636 | 0.04  | Cholan-24-oic acid, 3,7,12-tris(acetyloxy)-, methyl          | mainlib      |
| 18  | 524 | 601 | 0.04  | Ergostatetraenol, trimethylsilyl                             | mainlib      |
| 19  | 521 | 604 | 0.04  | 1,10-Secoergosta-5,7,9,22-tetraen-3-ol, acetate              | mainlib      |
| 20  | 516 | 584 | 0.03  | Ergocalciferol                                               | mainlib      |

Silane, (ergosta-5,7,22-trien-3 $\alpha$ -yloxy)trimethyl-  
 Formula C<sub>31</sub>H<sub>52</sub>O<sub>2</sub>Si, MW 468, CAS# 2625-45-8, Entry# 27623  
 (22E)-3-[(Trimethylsilyl)oxy]ergosta-5,7,22-triene #

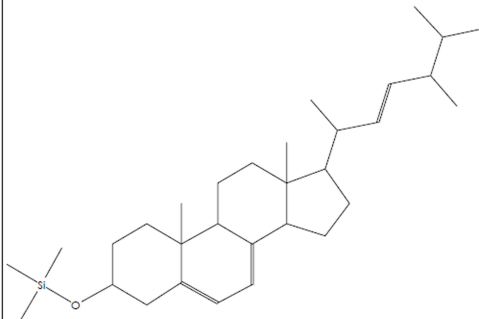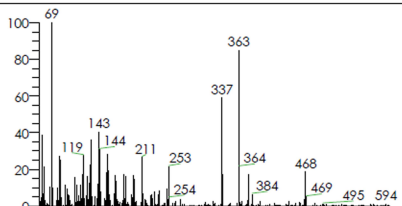

NL: 9.99E2  
 V5220812#946-960 RT:  
 19.12-19.36 AV: 15 SB: 8  
 19.48-19.60 T: (0,0) + c EI  
 det=349.00 Full ms [  
 50.00-600.00]

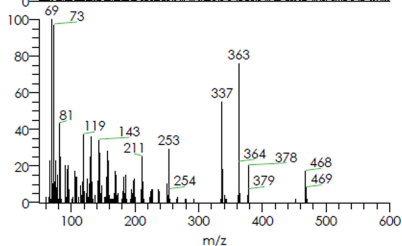

NL: 9.99E2  
 SI 759, RSI 837, mainlib, Entry#  
 27623, CAS# 2625-45-8, Silane,  
 (ergosta-5,7,22-trien-3 $\alpha$ -  
 yloxy)trimethyl-

Raw data - Library entry

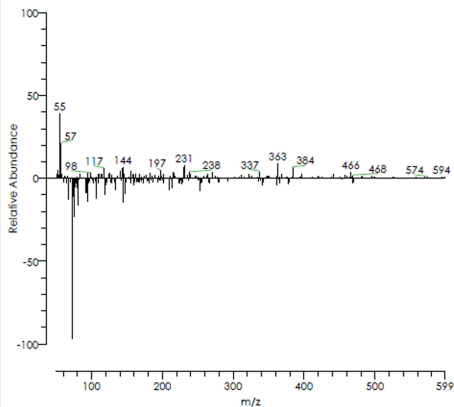

| Hit | SI  | RSI | Prob  | Name                                                       | Library Name |
|-----|-----|-----|-------|------------------------------------------------------------|--------------|
| 1   | 735 | 804 | 89.59 | Silane, (ergosta-5,7,22-trien-3 $\alpha$ -yloxy)trimethyl- | mainlib      |
| 2   | 641 | 738 | 7.33  | Ergosterol                                                 | replib       |
| 3   | 629 | 697 | 7.33  | Ergosterol                                                 | replib       |
| 4   | 619 | 652 | 7.33  | Ergosterol                                                 | mainlib      |
| 5   | 600 | 718 | 1.67  | Ergosta-5,8,22-trien-3-ol, (3 $\alpha$ ,22E)-              | mainlib      |
| 6   | 562 | 632 | 0.40  | Ergosta-9(11),20(22)-dien-3,6-diol, diacetat-              | mainlib      |
| 7   | 543 | 575 | 0.19  | 5,7,22-Ergostatriene, 3-(methoxymethoxy)-                  | mainlib      |
| 8   | 539 | 565 | 0.16  | 5,8-(4-Phenyl-1,2,4-triazolidine-3,5-dione)-1,2-           | mainlib      |
| 9   | 525 | 636 | 0.10  | Cholesta-9(11),20(22)-dien-23-one, 3,6-bis( $\alpha$ )     | mainlib      |
| 10  | 521 | 673 | 0.08  | Cholesta-5,7-dien-3-ol, acetate, (3 $\alpha$ )-            | replib       |
| 11  | 516 | 530 | 0.07  | Spiro(1,3-dithiane)-2,16'-(androst-5'-en-3',17'-           | mainlib      |
| 12  | 512 | 649 | 0.05  | 3,5-Cyclo-6,8(14),22-ergostatriene                         | mainlib      |
| 13  | 504 | 675 | 0.04  | Ergost-4,7,22-trien-3 $\alpha$ -ol                         | mainlib      |
| 14  | 500 | 648 | 0.03  | Cholestane-3,7,12,25-tetrol, tetraacetate, (3 $\beta$ )    | mainlib      |
| 15  | 499 | 623 | 0.03  | Ergosta-5,7,22-trien-3-ol, acetate                         | mainlib      |
| 16  | 498 | 604 | 0.03  | Cholan-24-oic acid, 3,7,12-tris(acetyloxy)-, m             | mainlib      |
| 17  | 487 | 636 | 0.02  | Cholesta-5,7-dien-3 $\alpha$ -ol, 3,5-dinitrobenzoate      | replib       |
| 18  | 484 | 583 | 0.02  | Pregna-5,7-dien-3-ol, 20-(3-butynyl)-                      | mainlib      |
| 19  | 481 | 530 | 0.01  | Bufo-4,20,22-trienolide, 6-(acetyloxy)-3-( $\delta$ -D-    | mainlib      |

Silane, (ergosta-5,7,22-trien-3 $\alpha$ -yloxy)trimethyl-  
 Formula C31H52OSi, MW 468, CAS# 2625-45-8, Entry# 27623  
 [22E]-3-[[trimethylsilyloxy]ergosta-5,7,22-triene #

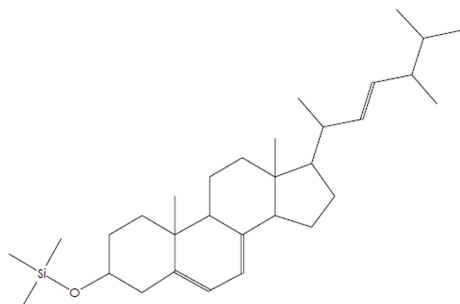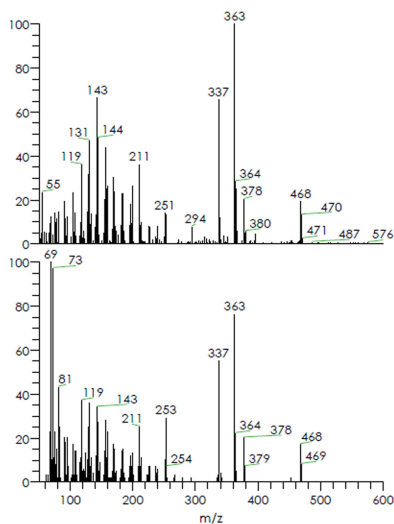

NL: 9.99E2  
 V5220816#1034-1043 RT:  
 20.63-20.78 AV: 10 SB: 1 17.13  
 T: {0,0} + c Et def=349.00 Full  
 ms [ 50.00-600.00]

NL: 9.99E2  
 SI 735, RSI 804, mainlib, Entry#  
 27623, CAS# 2625-45-8, Silane,  
 (ergosta-5,7,22-trien-3 $\alpha$ -  
 yloxy)trimethyl-

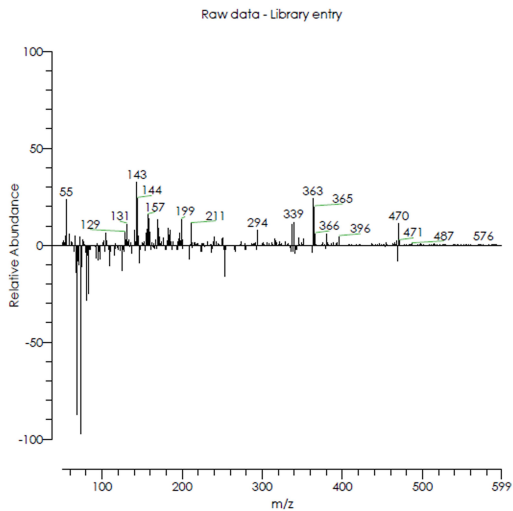

Raw data - Library entry

# IV

| Hit | SI  | RSI | Prob  | Name                                                                                  | Library Name |
|-----|-----|-----|-------|---------------------------------------------------------------------------------------|--------------|
| 1   | 791 | 841 | 79.07 | Silane, [[[3 $\alpha$ ,22E]-ergosta-7,22-dien-3-yl]oxy]trimethyl-                     | mainlib      |
| 2   | 730 | 755 | 13.77 | Silane, [[[3 $\alpha$ ,5 $\alpha$ ]-ergosta-8,24(28)-dien-3-yl]oxy]trimethyl-         | mainlib      |
| 3   | 692 | 736 | 3.30  | Silane, [[[3 $\alpha$ ,5 $\alpha$ ]-ergosta-7,22-dien-3-yl]oxy]trimethyl-             | mainlib      |
| 4   | 647 | 806 | 0.70  | Silane, trimethyl[[[3 $\alpha$ ]-stigmasta-7,24(28)-dien-3-yl]oxy]-                   | mainlib      |
| 5   | 639 | 669 | 0.52  | Silane, trimethyl[[[4 $\alpha$ -methylergosta-7,24(28)-dien-3 $\alpha$ -yl]ox         | mainlib      |
| 6   | 639 | 760 | 0.52  | Silane, trimethyl[[[3 $\alpha$ ,4 $\alpha$ ,5 $\alpha$ ]-4-methylcholesta-8,24-dien-3 | mainlib      |
| 7   | 638 | 746 | 0.50  | Silane, [[[3 $\alpha$ ,5 $\alpha$ ]-cholesta-8,24-dien-3-yl]oxy]trimethyl-            | mainlib      |
| 8   | 613 | 767 | 0.15  | Cholest-7-en-3-ol, (3 $\alpha$ ,5 $\alpha$ )-                                         | replib       |
| 9   | 609 | 687 | 0.12  | Ergosta-5,22-dien-3-ol, acetate, (3 $\alpha$ ,22E)-                                   | mainlib      |
| 10  | 596 | 649 | 0.08  | Cholic acid                                                                           | mainlib      |
| 11  | 593 | 751 | 0.07  | Cholest-8(14)-en-3-ol, (3 $\alpha$ ,5 $\alpha$ )-                                     | mainlib      |
| 12  | 593 | 615 | 0.08  | Cholic acid                                                                           | replib       |
| 13  | 581 | 728 | 0.04  | 25-Hydroxy-24-methylcholesterol, di-TMS                                               | mainlib      |
| 14  | 580 | 623 | 0.04  | 17-(1,5-Dimethylhexyl)-10,13-dimethyl-2,3,4,7,8,9,10,11,12,                           | mainlib      |
| 15  | 579 | 760 | 0.04  | Cholest-8-en-3-ol, (3 $\alpha$ )-                                                     | mainlib      |
| 16  | 579 | 652 | 0.04  | 2-(3-Hydroxy-4,4,10,13,14-pentamethyl-2,3,4,5,6,7,10,11,12                            | mainlib      |
| 17  | 579 | 631 | 0.04  | Methyl cholate                                                                        | replib       |
| 18  | 578 | 655 | 0.04  | Androst-9(11)-en-17-one, 3-[(trimethylsilyl)oxy]-, O-methyl                           | mainlib      |
| 19  | 576 | 600 | 0.04  | 5H-Cyclopropa[3,4]benz[1,2-e]azulen-5-one, 9,9a-bis(acet                              | mainlib      |
| 20  | 574 | 614 | 0.03  | Cholan-24-oic acid, 3,6,7-tris(acetyloxy)-, methyl ester, (3                          | mainlib      |
| 21  | 573 | 632 | 0.03  | 9,19-Cycloergost-24(28)-en-3-ol, 4,14-dimethyl-, acetate,                             | mainlib      |

Silane, [[[3 $\alpha$ ,22E]-ergosta-7,22-dien-3-yl]oxy]trimethyl-  
 Formula C<sub>31</sub>H<sub>54</sub>O<sub>3</sub>, MW 470, CAS# 55527-93-0, Entry# 27626  
 [22E]-3-[(Trimethylsilyl)oxy]ergosta-7,22-diene #

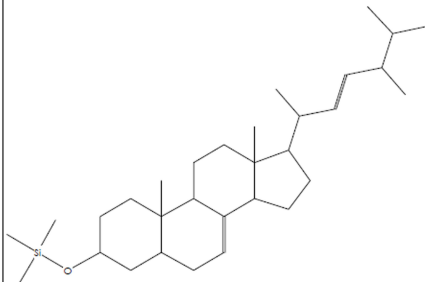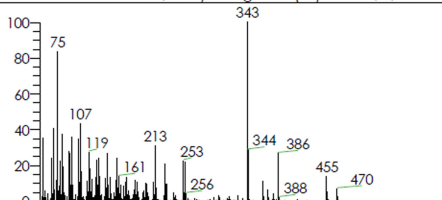

NL: 9.99E2  
 V5220812#1050-1057 RT:  
 20.90-21.02 AV: 8 SB: 8  
 19.48-19.60 T: (0,0) + c EI  
 det=349.00 Full ms [  
 50.00-600.00]

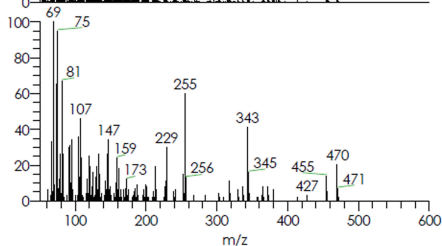

NL: 9.99E2  
 SI 791, RSI 841, mainlib, Entry#  
 27626, CAS# 55527-93-0, Silane,  
 [[[3 $\alpha$ ,22E]-ergosta-7,22-dien-3-  
 yl]oxy]trimethyl-

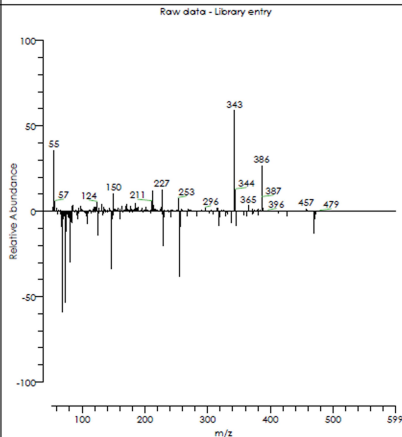

V

| Hit | SI  | RSI | Prob  | Name                                                                    | Library Name |
|-----|-----|-----|-------|-------------------------------------------------------------------------|--------------|
| 1   | 737 | 790 | 97.74 | Silane, trimethyl[[[3 $\alpha$ ]-stigmasta-7,24(28)-dien-3-yl]c         | mainlib      |
| 2   | 548 | 585 | 1.48  | Cobalt, 1,2-bis(diisopropylphosphino)ethane-cyclo                       | mainlib      |
| 3   | 471 | 490 | 0.18  | 5-Acetoxy-2-(3-acetoxy-4-methoxyphenyl)-3,7-dim                         | mainlib      |
| 4   | 446 | 577 | 0.05  | 2-Methyl-1-(3,4-dimethoxyphenyl)-1-(2,4-diisoprop                       | mainlib      |
| 5   | 438 | 505 | 0.04  | Silane, [[[(3 $\alpha$ ,22E)-ergosta-7,22-dien-3-yl]oxy]trimeth         | mainlib      |
| 6   | 433 | 472 | 0.03  | Cholestan-1-one                                                         | replib       |
| 7   | 428 | 524 | 0.02  | 5-(p-Aminophenyl)-4-(4-biphenyl)-2-thiazolamine                         | mainlib      |
| 8   | 427 | 475 | 0.02  | Androst-7-en-6-one, 2,3,17-tris(acetyloxy)-, (2 $\alpha$ ,3 $\alpha$ ,5 | mainlib      |
| 9   | 427 | 629 | 0.02  | 2H,8H-Benzo[1,2-b:5,4-b']dipyran-10-propanoic acid                      | mainlib      |
| 10  | 426 | 442 | 0.03  | Cholestan-1-one                                                         | mainlib      |
| 11  | 426 | 450 | 0.02  | 6H-Dibenzo[b,d]pyran, 6a,7,8,10a-tetrahydro-6,6,9-                      | replib       |
| 12  | 425 | 483 | 0.02  | 10-(Acenaphthylen-1-yl)-9-phenanthryl acetate                           | mainlib      |
| 13  | 424 | 450 | 0.02  | Chol-4-en-24-oic acid, 3-oxo-, methyl ester                             | mainlib      |
| 14  | 421 | 599 | 0.02  | Cholest-7-en-3-ol, (3 $\alpha$ ,5 $\alpha$ )-                           | mainlib      |
| 15  | 417 | 606 | 0.02  | 2H,8H-Benzo[1,2-b:5,4-b']dipyran-10-propanoic aci                       | replib       |
| 16  | 415 | 479 | 0.01  | Silane, [[[(3 $\alpha$ ,17 $\alpha$ )-17-methylandrost-5-ene-3,17-diy]  | mainlib      |
| 17  | 411 | 575 | 0.01  | Cholest-8(14)-en-3 $\alpha$ -ol                                         | mainlib      |
| 18  | 410 | 433 | 0.01  | Cholan-24-oic acid, 3-[(ethoxycarbonyl)oxy]-7,12-c                      | mainlib      |
| 19  | 409 | 616 | 0.01  | Cholan-16-one, 23-methyl-, (5 $\alpha$ ,20 $\alpha$ ,xi)-               | mainlib      |
| 20  | 406 | 434 | 0.01  | Thymolphthalein                                                         | mainlib      |
| 21  | 404 | 419 | 0.02  | 6H-Dibenzo[b,d]pyran, 6a,7,8,10a-tetrahydro-6,6,9-                      | mainlib      |

Silane, trimethyl[[[3 $\alpha$ ]-stigmasta-7,24(28)-dien-3-yl]oxy]-  
 Formula C<sub>32</sub>H<sub>56</sub>O<sub>Si</sub>, MW 484, CAS# 55527-95-2, Entry# 141100  
 [24]-3-[[Trimethylsilyloxy]stigmasta-7,24(28)-diene #

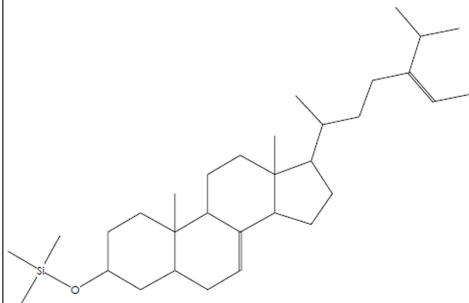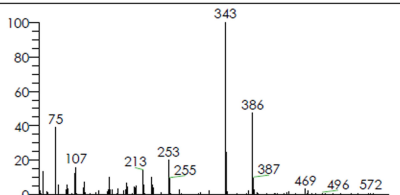

NL: 9.99E2  
 V5220812# 1217-1224 RT:  
 23.75-23.87 AV: 8 SB: 6  
 19.53-19.62 T: (0,0) + c EI  
 det=349.00 Full ms [  
 50.00-600.00]

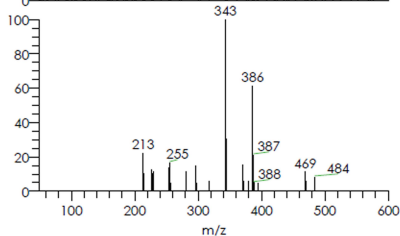

NL: 9.99E2  
 SI 737, RSI 790, mainlib, Entry#  
 141100, CAS# 55527-95-2,  
 Silane,  
 trimethyl[[[3 $\alpha$ ]-stigmasta-  
 7,24(28)-dien-3-yl]oxy]-

Raw data - Library entry

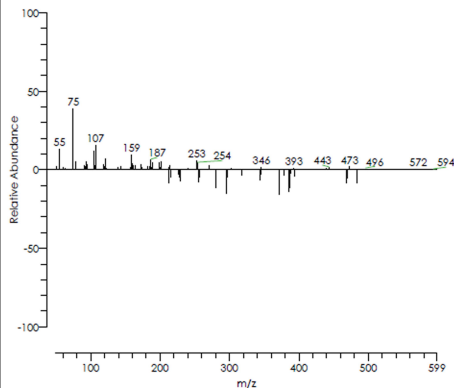

**Supplemental Figure 2.** Sterol identification. Mass spectrum of each GC peak was used to search against small molecule library of the National Institute of Standards and Technology Library (2001 Version) that was purchased with the GC-MS and the library search program is part of its operating software, Xcalibur. A sterol was positively identified if its mass spectrum fairly matched up with one in the library (score of SI and RSI matching factors  $\geq 800$ ) with a probability score  $\geq 70$ . Details about SI, RSI and probability may be found in Library Search Results Window of Xcalibur. There is a main library (mainlib) and also a replicate library (replib) for redundant spectra. So for cholesterol, there is the “mainlib” hit and 3 very similar hits in the replib and they all give basically the same SI, RSI, and Prob numbers. I: cholesterol; II and III: two ergosterol isoform stereoisomers termed #1 and #2, respectively; IV: ergosta-7,22-dien-3 $\beta$ -ol; and V: stigmasta-7-24(28)-dien-3 $\beta$ -ol.
